# Supplementary material for: Lipidomic profiling of the cerebrospinal fluid in moyamoya angiopathy patients
Source: Springer Nature journal article supplement (doi:10.1186/s13023-025-03782-5), 2025-05-23
Supplement: MOESM1 [file 13023_2025_3782_MOESM1_ESM.pdf]

**Additional file 1:**

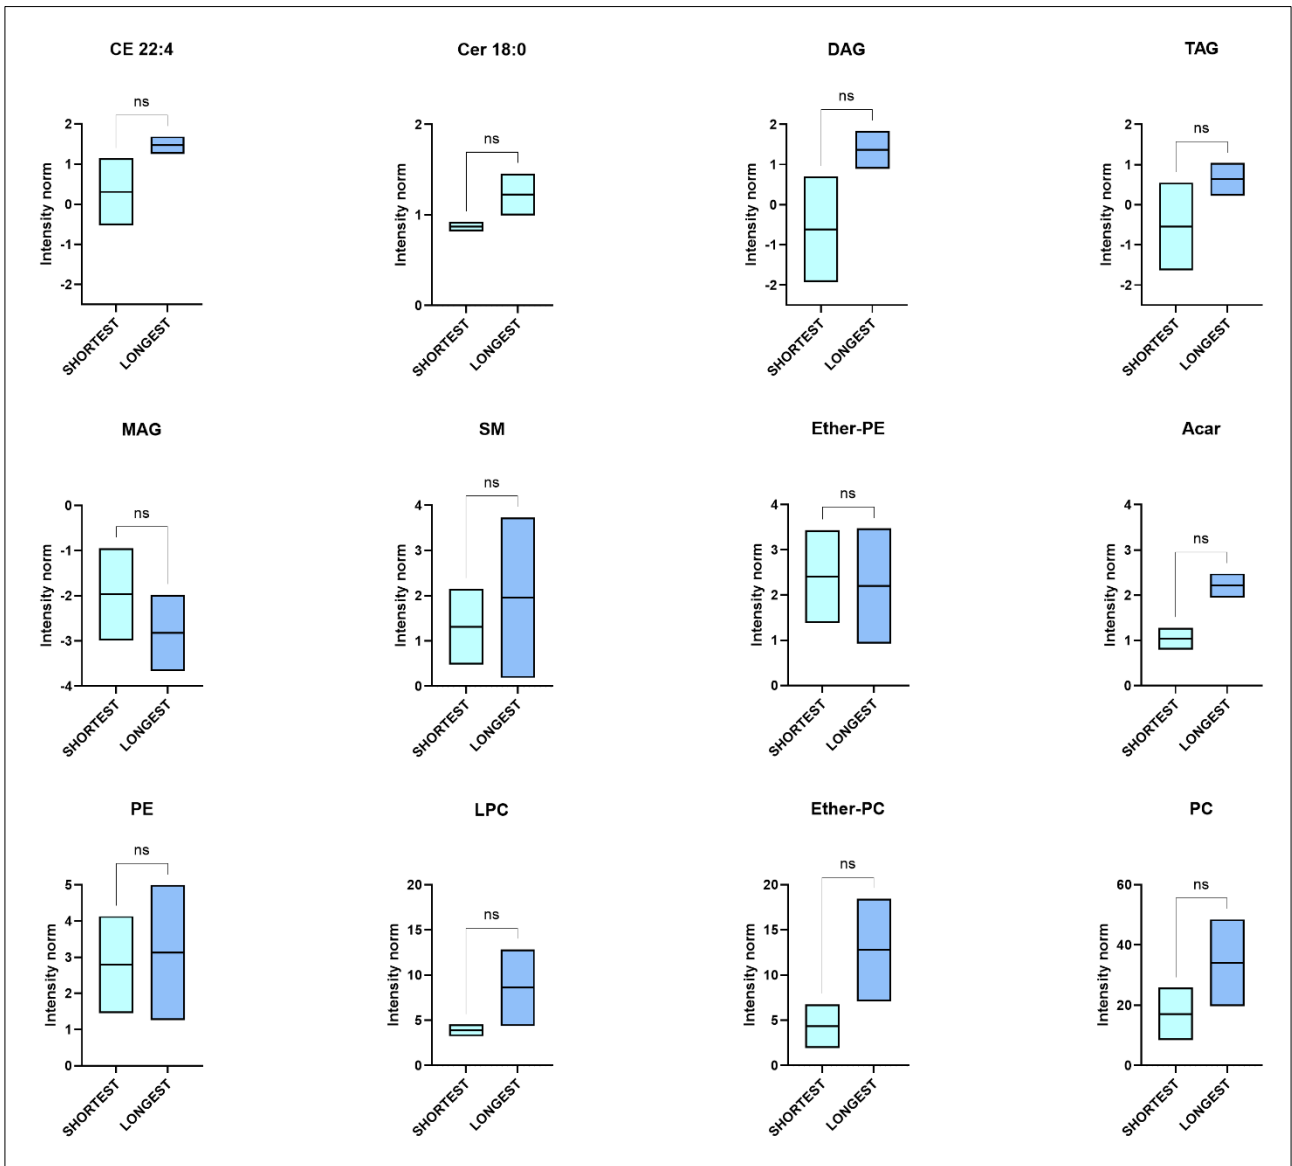

**VIP lipid class concentrations in MA patients, grouped based on MA duration.** The MA duration stands for the amount of months spent between index event (disease onset) and CSF sampling occurring during neovascularization procedures. The shortest MA duration refers to 5 months, while the longest one account for 37 months. Floating bars represent values (min to max). The line indicates a median value. Statistical significance is evaluated by comparing ranks with Mann-Whitney U test. Not statistically significant differences are denoted as *ns* (not significant). The nomenclature of lipid classes has been reported in Table 2.

Additional file 2:

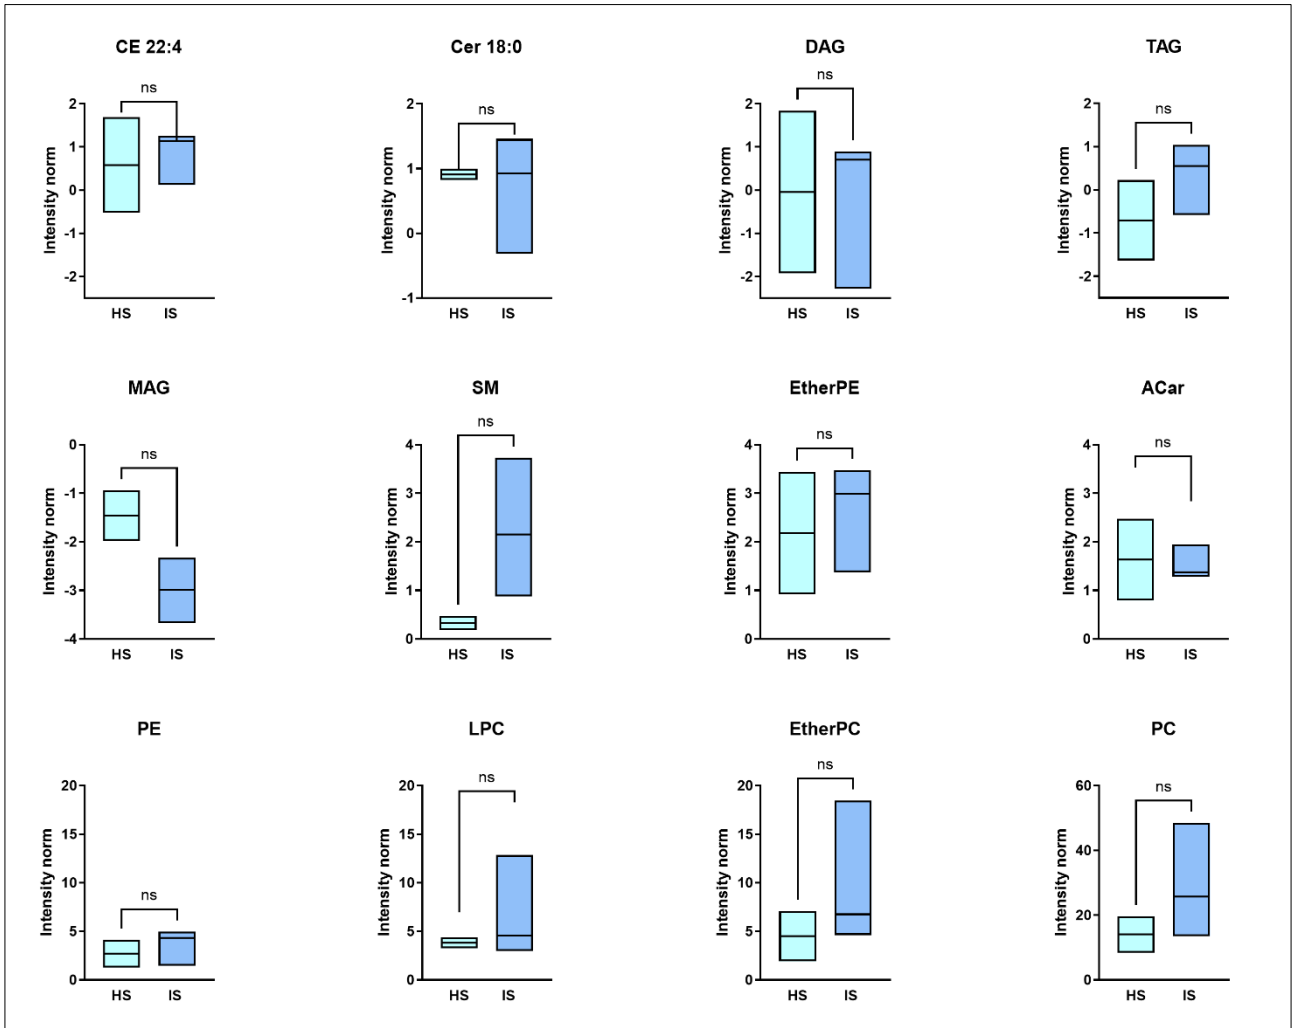

**VIP lipid class concentrations in MA patients, grouped based on MA presentation.** The MA cohort has been clustered, by differentiating patients with a haemorrhagic (HS) MA presentation from those with an ischemic (IS) one. Of note, the only one patient characterized by a TIA has been included within the IS group. Floating bars represent values (min to max). The line indicates a median value. Statistical significance is evaluated by comparing ranks with Mann-Whitney U test. Not statistically significant differences are denoted as *ns* (not significant). The nomenclature of lipid classes has been reported in Table 2.

Additional file 3:

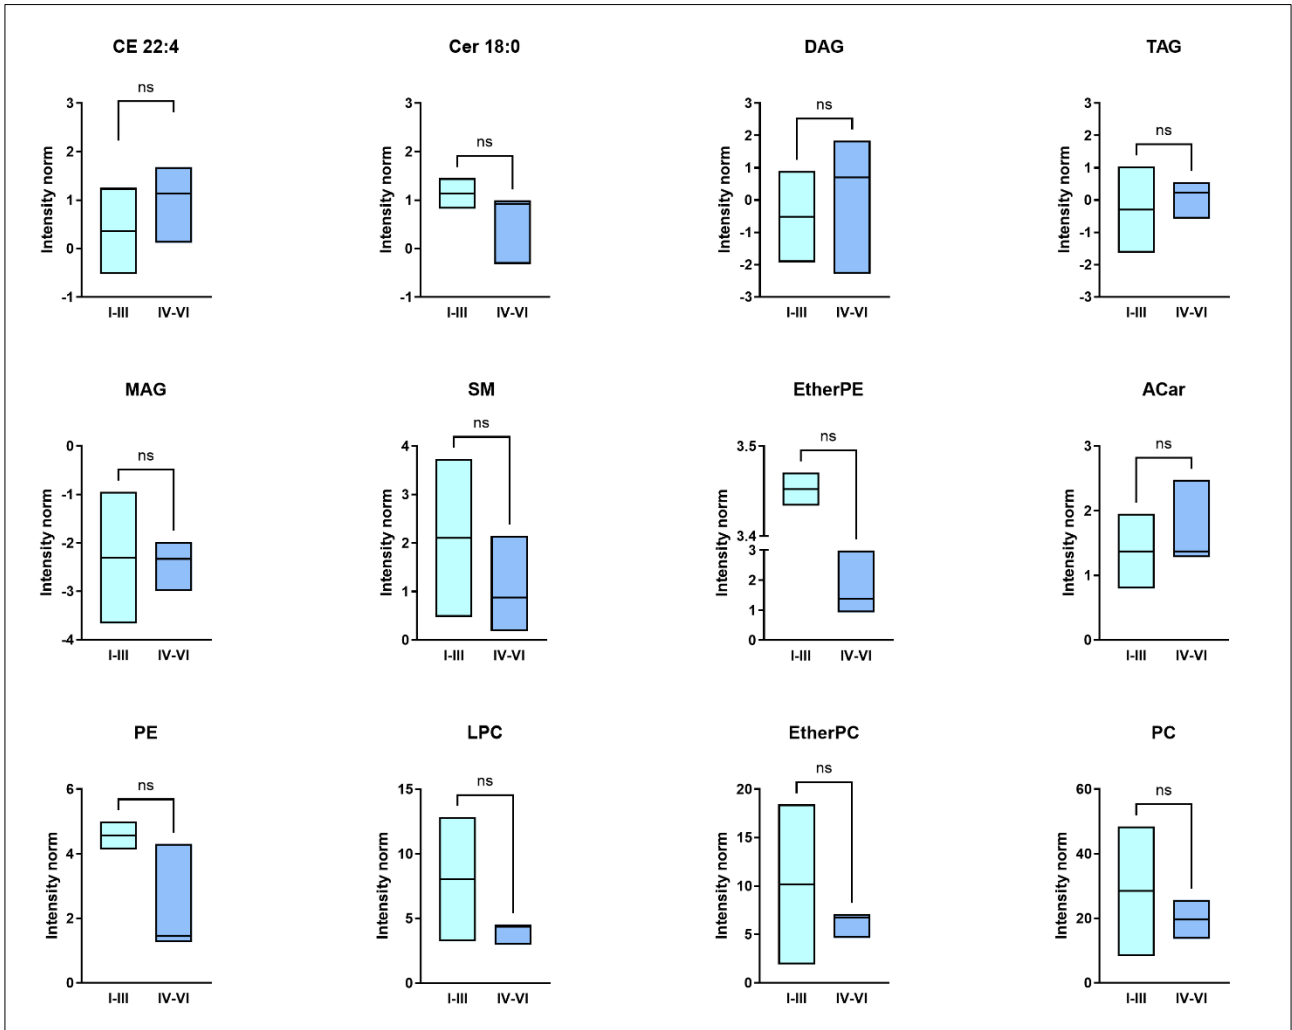

**VIP lipid class concentrations in MA patients, grouped based on Suzuki grading.** The MA cohort has been clustered, by differentiating patients characterized by a Suzuki grading I-III vs Suzuki grading IV-VI. Floating bars represent values (min to max). The line indicates a median value. Statistical significance is evaluated by comparing ranks with Mann-Whitney U test. Not statistically significant differences are denoted as *ns* (not significant). The nomenclature of lipid classes has been reported in Table 2.

Additional file 4:

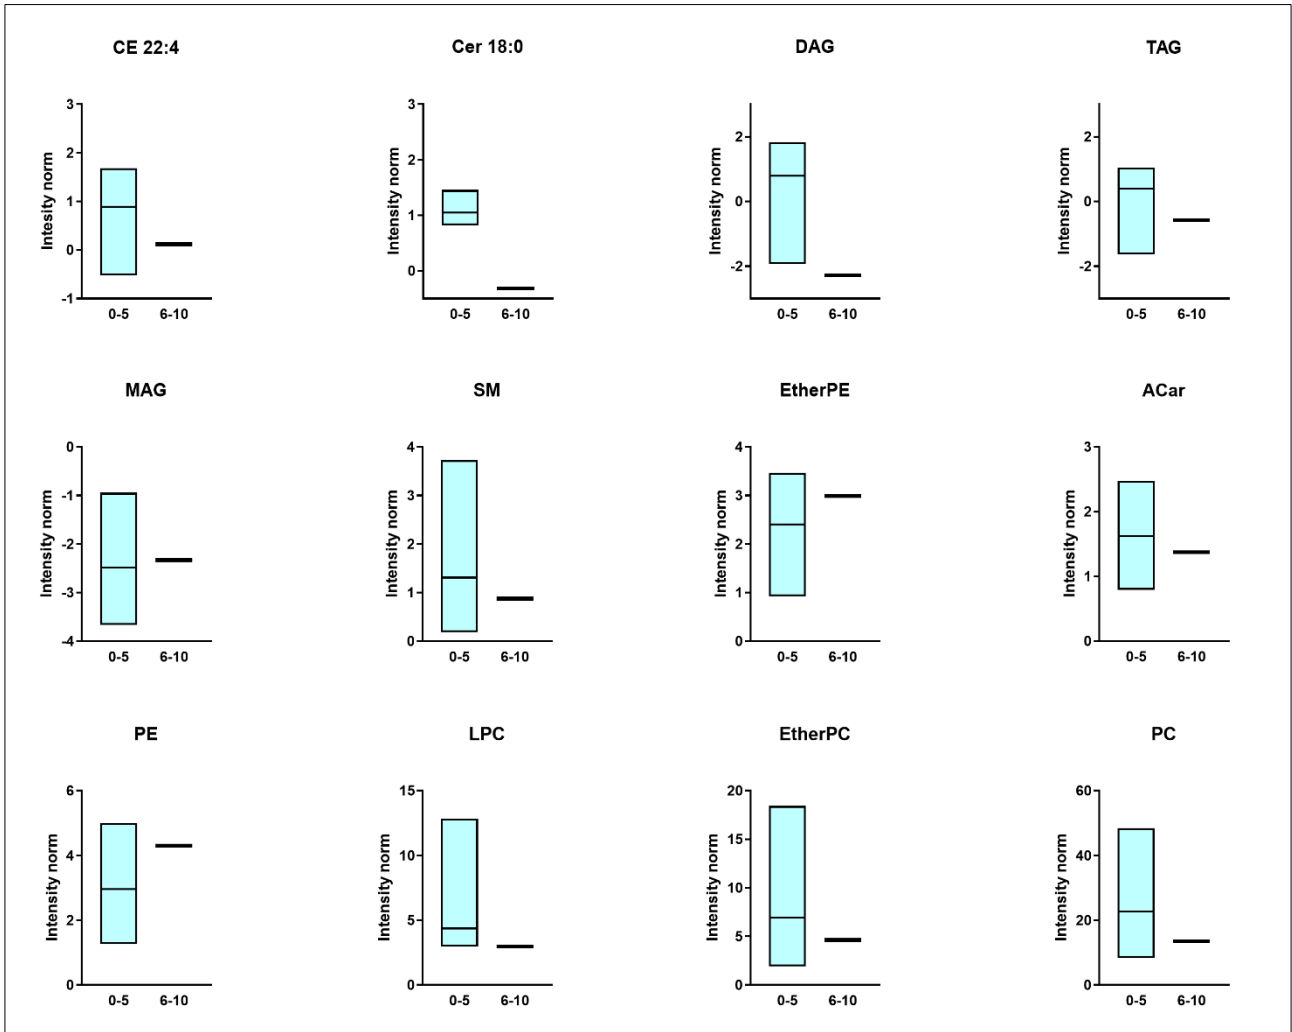

VIP lipid class concentrations in MA patients, grouped based on NIH Stroke Scale/Score (NIHSS). The MA cohort has been clustered, by differentiating patients characterized by NIHSS 0-5 vs 6-10. Floating bars represent values (min to max), as far as NIHSS 0-1 group. The line indicates a median value. Only one patient is associated to a NIHSS equal to 8 (NIHSS 6-10 group). Thus, due to the paucity of data characterizing this specific MA subgroup, it has not been possible to perform a proper statistical analysis.

Additional file 5:

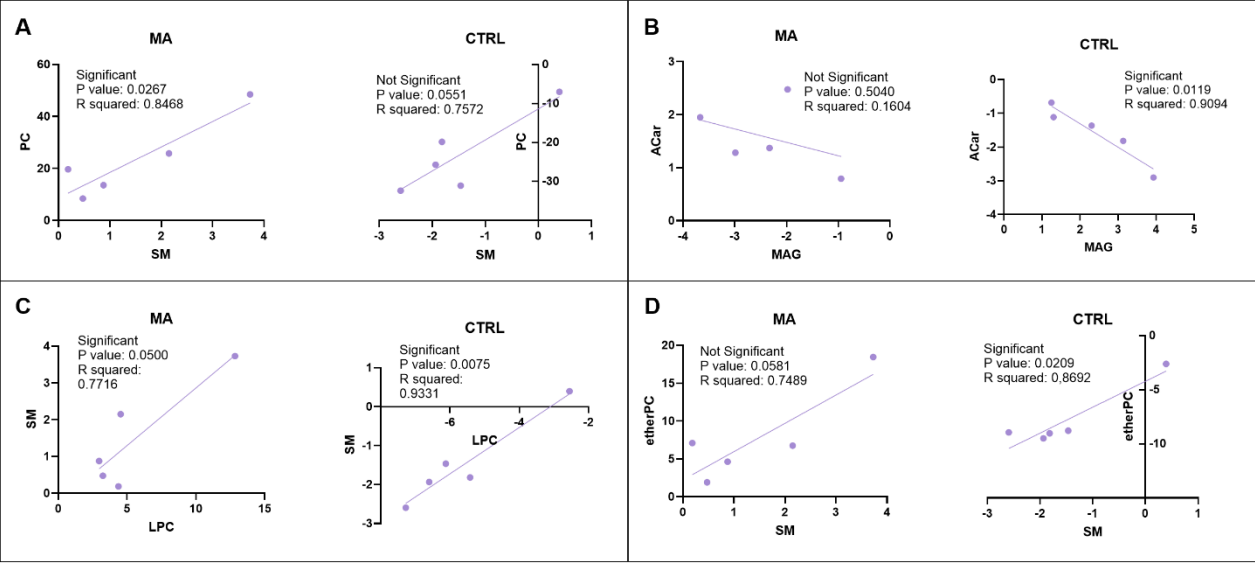

**Simple linear regression model.** Statistically significant simple linear regression analyses of selected lipid classes that showed  $VIP \geq 1.5$  in CSF of MA patients as compared to CTRL subjects; (A) PC/SM; (B) ACar/MAG; (C) SM/LPC; (D) ether PC/SM. The nomenclature of lipid classes has been reported in Table 2.
